# Supplementary material for: Inequalities by education and marital status in the co-occurrence of cardiovascular risk factors in Finland persisted between 1997–2017
Source: PubMed Central journal article supplement (PMC7272447; doi:10.1038/s41598-020-65959-1), 2020-06-04
Supplement: 41598_2020_65959_MOESM1_ESM.pdf [file 41598_2020_65959_MOESM1_ESM.pdf]

**Supplementary Tables 1, 2, 3, 4, 5 and 6**

for *“Inequalities by education and marital status in the co-occurrence of cardiovascular risk factors in Finland persisted between 1997–2017”*

in Scientific Reports

Paalanen L<sup>1</sup>, Härkänen T<sup>1</sup>, Kontto J<sup>1</sup>, Tolonen H<sup>1</sup>

<sup>1</sup>Department of Public Health Solutions, Finnish Institute for Health and Welfare (THL), P.O. Box 30, FI-00271 Helsinki, Finland

E-mail address of the corresponding author:

[laura.paalanen@thl.fi](mailto:laura.paalanen@thl.fi)

**Supplementary table 1**

Prevalence of risk factor combinations (%) among 25–64-year-old men in FINRISK (FR) 1997–2012 and FinHealth (FH) 2017 surveys (n=11,633)

| Number of risk factors | Current smoking | Obesity <sup>a</sup> | Elevated cholesterol <sup>b</sup> | Elevated blood pressure <sup>c</sup> | FR97  | FR02 | FR07 | FR12 | FH2017 | p      |      |
|------------------------|-----------------|----------------------|-----------------------------------|--------------------------------------|-------|------|------|------|--------|--------|------|
| 4                      | +               | +                    | +                                 | +                                    |       | 2.6  | 3.5  | 1.8  | 2.7    | 2.1    | 0.01 |
|                        |                 |                      |                                   |                                      | Total | 2.6  | 3.5  | 1.8  | 2.7    | 2.1    |      |
| 3                      | +               | +                    | +                                 | -                                    | 1.7   | 1.8  | 2.0  | 1.9  | 1.4    | 0.88   |      |
|                        |                 |                      |                                   | +                                    | 0.6   | 0.8  | 1.0  | 1.1  | 1.6    | 0.19   |      |
|                        |                 |                      |                                   | +                                    | 9.0   | 7.7  | 6.8  | 4.8  | 3.5    | <0.001 |      |
|                        |                 |                      |                                   | -                                    | 6.8   | 6.1  | 5.3  | 5.6  | 3.9    | 0.02   |      |
|                        |                 |                      |                                   | Total                                | 18.1  | 16.4 | 15.1 | 13.4 | 10.4   |        |      |
| 2                      | +               | +                    | -                                 | -                                    | 0.4   | 0.9  | 1.1  | 1.0  | 1.6    | 0.06   |      |
|                        |                 |                      | +                                 | -                                    | 10.8  | 12.2 | 8.6  | 8.4  | 4.5    | <0.001 |      |
|                        |                 |                      | +                                 | -                                    | 2.7   | 2.2  | 2.7  | 2.9  | 1.7    | 0.29   |      |
|                        |                 |                      | -                                 | +                                    | 2.6   | 3.4  | 2.9  | 2.5  | 6.2    | <0.001 |      |
|                        |                 |                      | -                                 | +                                    | 1.7   | 2.1  | 3.3  | 2.7  | 3.0    | 0.01   |      |
|                        |                 |                      | -                                 | -                                    | 18.1  | 12.0 | 13.5 | 14.0 | 11.8   | <0.001 |      |
|                        |                 |                      | Total                             | 36.3                                 | 32.8  | 32.1 | 31.5 | 28.8 |        |        |      |
| 1                      | +               | -                    | -                                 | -                                    | 5.5   | 7.8  | 7.9  | 6.1  | 7.0    | 0.03   |      |
|                        |                 |                      | -                                 | +                                    | 0.9   | 2.2  | 1.4  | 3.0  | 3.6    | <0.001 |      |
|                        |                 |                      | -                                 | -                                    | 17.6  | 18.6 | 17.9 | 19.1 | 22.2   | 0.10   |      |
|                        |                 |                      | -                                 | -                                    | 5.6   | 5.2  | 7.7  | 5.8  | 5.7    | 0.05   |      |
|                        |                 |                      | Total                             | 29.6                                 | 33.8  | 34.9 | 34.0 | 38.5 |        |        |      |
| 0                      | -               | -                    | -                                 | -                                    | 13.2  | 13.7 | 16.2 | 18.6 | 20.1   | <0.001 |      |
|                        |                 |                      |                                   |                                      | Total | 13.2 | 13.7 | 16.2 | 18.6   |        | 20.1 |

<sup>a</sup>BMI≥30 kg/m<sup>2</sup>
<sup>b</sup>Serum total cholesterol ≥5.0 mmol/l (**use of cholesterol-lowering medicines not considered**)

<sup>c</sup>Systolic blood pressure ≥140 mmHg or diastolic blood pressure ≥90 mmHg (**use of antihypertensive medicines not considered**)

## Supplementary table 2

Prevalence of risk factor combinations (%) among 25–64-year-old women in FINRISK (FR) 1997–2012 and FinHealth (FH) 2017 surveys (n=13,403)

| Number of risk factors | Current smoking | Obesity <sup>a</sup> | Elevated cholesterol <sup>b</sup> | Elevated blood pressure <sup>c</sup> | FR97  | FR02 | FR07 | FR12 | FH2017 | p      |      |
|------------------------|-----------------|----------------------|-----------------------------------|--------------------------------------|-------|------|------|------|--------|--------|------|
| 4                      | +               | +                    | +                                 | +                                    |       | 1.4  | 1.0  | 1.2  | 1.3    | 1.3    | 0.75 |
|                        |                 |                      |                                   |                                      | Total | 1.4  | 1.0  | 1.2  | 1.3    | 1.3    |      |
| 3                      | +               | +                    | +                                 | -                                    | 1.4   | 1.8  | 1.6  | 1.5  | 2.3    | 0.58   |      |
|                        |                 |                      |                                   | +                                    | 0.1   | 0.4  | 0.9  | 0.4  | 0.1    | 0.17   |      |
|                        |                 |                      |                                   | +                                    | 3.5   | 2.4  | 1.9  | 2.4  | 1.9    | 0.03   |      |
|                        |                 |                      |                                   | -                                    | 7.2   | 5.3  | 5.2  | 5.6  | 3.6    | <0.001 |      |
|                        |                 |                      |                                   | Total                                | 12.2  | 9.9  | 9.6  | 9.9  | 7.9    |        |      |
| 2                      | +               | +                    | -                                 | -                                    | 0.7   | 1.1  | 1.0  | 0.9  | 1.2    | 0.69   |      |
|                        |                 |                      | +                                 | -                                    | 8.8   | 7.7  | 6.6  | 6.4  | 5.0    | 0.001  |      |
|                        |                 |                      | +                                 | -                                    | 0.9   | 1.2  | 1.2  | 0.6  | 1.0    | 0.51   |      |
|                        |                 |                      | -                                 | +                                    | 4.0   | 4.5  | 4.5  | 5.4  | 7.3    | <0.01  |      |
|                        |                 |                      | -                                 | +                                    | 1.3   | 1.3  | 1.7  | 1.6  | 1.8    | 0.67   |      |
|                        |                 |                      | -                                 | -                                    | 12.6  | 9.9  | 8.5  | 9.6  | 7.1    | <0.001 |      |
|                        |                 |                      | Total                             | 28.3                                 | 25.7  | 23.5 | 24.5 | 23.4 |        |        |      |
| 1                      | +               | -                    | -                                 | -                                    | 7.0   | 8.9  | 8.5  | 7.4  | 6.5    | 0.09   |      |
|                        |                 |                      | -                                 | +                                    | 1.9   | 2.2  | 2.8  | 3.3  | 4.6    | <0.001 |      |
|                        |                 |                      | -                                 | -                                    | 26.4  | 24.6 | 23.0 | 26.2 | 26.5   | 0.06   |      |
|                        |                 |                      | -                                 | -                                    | 3.4   | 5.0  | 5.2  | 3.8  | 2.5    | 0.001  |      |
|                        |                 |                      | Total                             | 38.7                                 | 40.7  | 39.5 | 40.7 | 40.1 |        |        |      |
| 0                      | -               | -                    | -                                 | -                                    | 19.3  | 22.5 | 26.1 | 23.8 | 27.3   | <0.001 |      |
|                        |                 |                      |                                   |                                      | Total | 19.3 | 22.5 | 26.1 | 23.8   |        | 27.3 |

<sup>a</sup>BMI≥30 kg/m<sup>2</sup>

<sup>b</sup>Serum total cholesterol ≥5.0 mmol/l (**use of cholesterol-lowering medicines not considered**)

<sup>c</sup>Systolic blood pressure ≥140 mmHg or diastolic blood pressure ≥90 mmHg (**use of antihypertensive medicines not considered**)

**Supplementary table 3**

 Risk factor accumulation score<sup>a</sup> by education in FINRISK (FR) 1997–2012 and FinHealth (FH) 2017 surveys. The age range of included participants was 25–64 years.

| Risk factor score <sup>a</sup> | Education level | FR97             | FR02             | FR07             | FR12             | FH2017           | p for interaction <sup>b</sup> |
|--------------------------------|-----------------|------------------|------------------|------------------|------------------|------------------|--------------------------------|
| <b>Men (n=11,540)</b>          |                 |                  |                  |                  |                  |                  | 0.89                           |
| 1<br><i>lowest risk</i>        | Low             | 9.5 (7.5-11.7)   | 8.7 (6.7-10.8)   | 9.7 (7.0-12.6)   | 13.1 (10.0-16.1) | 13.8 (9.3-18.4)  |                                |
|                                | Intermediate    | 11.6 (9.3-14.0)  | 11.1 (8.7-13.7)  | 16.1 (13.0-19.2) | 18.1 (14.7-21.8) | 22.4 (17.9-27.3) |                                |
|                                | High            | 16.1 (13.9-18.4) | 19.5 (16.8-22.5) | 20.1 (17.1-23.4) | 20.3 (16.8-24.0) | 19.9 (15.5-24.7) |                                |
| 2                              | Low             | 26.8 (23.8-29.7) | 29.9 (26.7-33.2) | 32.2 (28.1-36.5) | 31.3 (27.8-35.2) | 31.8 (25.8-38.4) |                                |
|                                | Intermediate    | 28.9 (25.9-32.1) | 35.2 (31.7-39.2) | 32.6 (28.7-36.3) | 34.2 (29.8-38.3) | 35.7 (30.4-42.1) |                                |
|                                | High            | 34.3 (31.2-37.5) | 35.6 (32.3-38.9) | 39.3 (35.3-43.3) | 39.7 (34.9-44.5) | 45.9 (40.2-51.6) |                                |
| 3                              | Low             | 38.9 (35.7-42.2) | 36.5 (33.0-40.0) | 36.5 (32.3-40.7) | 35.2 (31.2-39.6) | 33.2 (26.7-39.8) |                                |
|                                | Intermediate    | 37.7 (34.6-40.7) | 33.6 (30.2-37.1) | 33.4 (29.7-37.1) | 31.7 (27.8-35.9) | 29.5 (24.3-34.6) |                                |
|                                | High            | 33.1 (29.9-35.9) | 28.7 (25.5-32.3) | 28.8 (25.4-32.5) | 28.0 (24.0-32.2) | 24.2 (19.4-29.1) |                                |
| 4<br><i>highest risk</i>       | Low             | 24.8 (22.1-27.7) | 24.8 (21.7-28.0) | 21.5 (18.1-25.3) | 20.4 (17.3-23.5) | 21.2 (14.4-27.9) |                                |
|                                | Intermediate    | 21.8 (19.2-24.4) | 20.0 (17.3-22.6) | 17.9 (15.0-20.7) | 16.0 (12.9-19.2) | 12.4 (9.0-16.3)  |                                |
|                                | High            | 16.5 (14.2-19.0) | 16.2 (13.4-18.7) | 11.8 (9.2-14.4)  | 12.0 (9.4-15.0)  | 10.0 (6.7-13.9)  |                                |
| <b>Women (n=13,277)</b>        |                 |                  |                  |                  |                  |                  | 0.09                           |
| 1<br><i>lowest risk</i>        | Low             | 12.6 (10.5-15.1) | 16.2 (13.8-18.8) | 18.7 (15.7-21.9) | 18.2 (15.0-21.5) | 22.7 (18.1-27.7) |                                |
|                                | Intermediate    | 20.4 (18.2-22.6) | 19.8 (17.2-22.4) | 27.6 (24.4-31.0) | 21.5 (18.0-25.1) | 31.9 (26.8-37.3) |                                |
|                                | High            | 22.9 (20.4-25.6) | 28.3 (25.5-31.1) | 32.3 (29.0-35.7) | 27.8 (24.4-31.1) | 32.6 (28.0-37.5) |                                |
| 2                              | Low             | 36.9 (33.7-39.9) | 36.1 (33.0-39.3) | 36.6 (32.8-40.2) | 39.3 (35.3-43.4) | 33.5 (28.2-38.9) |                                |
|                                | Intermediate    | 39.1 (36.2-42.2) | 41.1 (37.8-44.3) | 38.6 (34.8-42.5) | 42.1 (38.0-46.1) | 39.5 (34.1-45.4) |                                |
|                                | High            | 42.6 (39.5-45.9) | 42.4 (39.2-45.7) | 40.6 (36.7-44.4) | 39.7 (35.7-44.0) | 41.4 (36.2-46.0) |                                |
| 3                              | Low             | 34.2 (31.2-37.4) | 31.4 (28.5-34.3) | 31.8 (28.6-35.8) | 29.1 (25.3-32.8) | 29.9 (25.2-35.3) |                                |
|                                | Intermediate    | 28.5 (25.6-31.1) | 27.8 (24.7-30.8) | 22.0 (18.9-25.2) | 24.9 (21.7-28.3) | 21.4 (17.1-26.2) |                                |
|                                | High            | 22.6 (19.9-25.3) | 23.0 (20.4-26.0) | 19.4 (16.5-22.8) | 22.5 (19.1-25.7) | 17.5 (13.8-21.6) |                                |
| 4<br><i>highest risk</i>       | Low             | 16.2 (14.2-18.4) | 16.3 (14.0-18.5) | 12.8 (10.4-15.5) | 13.4 (10.7-16.1) | 13.9 (9.9-18.0)  |                                |
|                                | Intermediate    | 12.0 (10.1-13.9) | 11.4 (9.2-13.6)  | 11.7 (9.6-13.9)  | 11.5 (9.1-13.9)  | 7.2 (4.5-10.1)   |                                |
|                                | High            | 11.9 (9.8-13.7)  | 6.3 (4.9-7.9)    | 7.8 (5.9-9.8)    | 10.0 (7.7-12.5)  | 8.4 (5.5-11.5)   |                                |

<sup>a</sup>The risk factor accumulation score was formed from the following four risk factors: current smoking, obesity, elevated total cholesterol and elevated blood pressure (**based on measured cholesterol and blood pressure values only; use of cholesterol-lowering or antihypertensive medicines not considered**). The classes were as follows: 1) no risk factors, 2) one risk factor, 3) two risk factors, and 4) three or four risk factors.

<sup>b</sup>Interaction between education and study year

**Supplementary table 4**

Risk factor accumulation score<sup>a</sup> by marital status in FINRISK (FR) 1997–2012 and FinHealth (FH) 2017 surveys. The age range of included participants was 25–64 years.

| Risk factor score <sup>a</sup> | Marital status <sup>b</sup> | FR97             | FR02             | FR07             | FR12             | FH2017           | p for interaction <sup>c</sup> |
|--------------------------------|-----------------------------|------------------|------------------|------------------|------------------|------------------|--------------------------------|
| <b>Men (n=11,616)</b>          |                             |                  |                  |                  |                  |                  | 0.08                           |
| 1<br><i>lowest risk</i>        | Married                     | 12.2 (10.8-13.6) | 12.6 (11.0-14.1) | 15.8 (13.9-17.7) | 18.0 (16.1-20.2) | 18.3 (15.2-21.6) |                                |
|                                | Single                      | 13.4 (10.9-15.8) | 14.4 (11.6-17.5) | 15.0 (11.9-18.4) | 15.6 (12.1-19.6) | 20.0 (15.1-25.7) |                                |
| 2                              | Married                     | 30.9 (28.9-32.9) | 35.1 (33.0-37.4) | 37.4 (34.8-39.9) | 34.3 (31.7-36.8) | 38.9 (35.4-42.9) |                                |
|                                | Single                      | 28.1 (24.5-31.8) | 28.7 (24.5-32.8) | 27.9 (23.7-32.5) | 36.2 (31.5-41.0) | 35.9 (28.9-43.3) |                                |
| 3                              | Married                     | 37.5 (35.5-39.6) | 34.2 (32.0-36.5) | 30.9 (28.5-33.3) | 32.1 (29.5-34.6) | 29.4 (25.7-33.1) |                                |
|                                | Single                      | 33.1 (29.3-36.9) | 29.4 (25.6-33.5) | 37.6 (33.1-41.8) | 30.9 (25.9-35.5) | 27.5 (21.6-33.4) |                                |
| 4<br><i>highest risk</i>       | Married                     | 19.4 (17.8-20.9) | 18.1 (16.4-19.7) | 16.0 (14.1-17.8) | 15.6 (13.9-17.5) | 13.4 (10.0-17.0) |                                |
|                                | Single                      | 25.4 (22.1-28.5) | 27.5 (23.6-31.2) | 19.5 (15.8-23.4) | 17.4 (13.5-21.3) | 16.6 (11.5-22.5) |                                |
| <b>Women (n=13,380)</b>        |                             |                  |                  |                  |                  |                  | 0.70                           |
| 1<br><i>lowest risk</i>        | Married                     | 19.3 (17.8-20.9) | 22.8 (21.2-24.5) | 28.1 (25.9-30.3) | 23.6 (21.6-25.8) | 31.2 (27.9-34.5) |                                |
|                                | Single                      | 16.5 (13.8-19.3) | 18.1 (15.0-20.9) | 21.4 (18.0-25.0) | 20.8 (17.3-24.1) | 24.0 (18.7-29.1) |                                |
| 2                              | Married                     | 39.8 (37.8-41.7) | 39.4 (37.4-41.6) | 38.5 (35.8-40.9) | 40.7 (38.2-43.2) | 36.6 (33.0-40.1) |                                |
|                                | Single                      | 38.1 (34.5-41.8) | 40.6 (36.8-44.4) | 38.8 (34.3-42.9) | 39.1 (34.4-43.4) | 43.8 (37.5-49.6) |                                |
| 3                              | Married                     | 28.3 (26.5-30.1) | 26.6 (24.8-28.3) | 23.6 (21.6-25.7) | 25.0 (22.8-27.1) | 23.0 (20.1-26.0) |                                |
|                                | Single                      | 29.5 (26.4-32.9) | 29.2 (25.8-32.7) | 26.4 (22.6-30.3) | 26.5 (22.8-30.4) | 21.2 (16.4-26.5) |                                |
| 4<br><i>highest risk</i>       | Married                     | 12.5 (11.2-13.9) | 11.1 (9.8-12.5)  | 9.8 (8.4-11.2)   | 10.7 (9.2-12.3)  | 9.2 (7.3-11.2)   |                                |
|                                | Single                      | 15.9 (13.5-18.5) | 12.1 (9.8-14.5)  | 13.5 (10.9-16.3) | 13.6 (10.9-16.8) | 11.0 (7.2-15.6)  |                                |

<sup>a</sup>The risk factor accumulation score was formed from the following four risk factors: current smoking, obesity, elevated total cholesterol and elevated blood pressure (**based on measured cholesterol and blood pressure values only; use of cholesterol-lowering or antihypertensive medicines not considered**). The classes were as follows: 1) no risk factors, 2) one risk factor, 3) two risk factors, and 4) three or four risk factors.

<sup>b</sup>Marital status classes were as follows: married = living with a spouse/partner (i.e. married, cohabiting), and single = living without a spouse (i.e. single, separated or divorced, widowed).

<sup>c</sup>Interaction between marital status and study year

**Supplementary table 5**

Crosstabulation of subjects with elevated total cholesterol<sup>a</sup> vs. using cholesterol-lowering medication and subjects with elevated blood pressure<sup>b</sup> vs. using antihypertensive medicines in FINRISK (FR) 1997–2012 and FinHealth (FH) 2017 surveys<sup>c</sup>. The age range of included participants was 25–64 years (11,616 men and 13,380 women).

|                                   | FR97         | FR02         | FR07         | FR12         | FH2017       |
|-----------------------------------|--------------|--------------|--------------|--------------|--------------|
| <b>Total cholesterol</b>          |              |              |              |              |              |
| No elevated level & no medication | 2139 (30.3%) | 2214 (34.7%) | 1852 (38.8%) | 1487 (34.0%) | 927 (37.6%)  |
| No elevated level & on medication | 42 (0.6%)    | 171 (2.7%)   | 237 (4.9%)   | 242 (5.5%)   | 159 (6.4%)   |
| Elevated level & no medication    | 4722 (67.0%) | 3819 (59.9%) | 2512 (52.6%) | 2497 (57.1%) | 1307 (53.0%) |
| Elevated level & on medication    | 145 (2.1%)   | 171 (2.7%)   | 173 (3.6%)   | 147 (3.4%)   | 73 (3.0%)    |
| <b>Blood pressure</b>             |              |              |              |              |              |
| No elevated level & no medication | 4061 (57.6%) | 3872 (60.7%) | 2826 (59.2%) | 2612 (59.7%) | 1536 (62.3%) |
| No elevated level & on medication | 185 (2.6%)   | 244 (3.8%)   | 248 (5.2%)   | 275 (6.3%)   | 179 (7.3%)   |
| Elevated level & no medication    | 2222 (31.5%) | 1751 (27.5%) | 1301 (27.3%) | 1128 (25.8%) | 548 (22.2%)  |
| Elevated level & on medication    | 580 (8.2%)   | 508 (8.0%)   | 399 (8.4%)   | 358 (8.2%)   | 203 (8.2%)   |

<sup>a</sup>Serum total cholesterol  $\geq 5.0$  mmol/l

<sup>b</sup>Systolic blood pressure  $\geq 140$  mmHg or diastolic blood pressure  $\geq 90$  mmHg

<sup>c</sup>Crude rates

**Supplementary table 6**

The proportion of subjects with elevated blood pressure<sup>a</sup> and using antihypertensive medicines by sex and by education in FINRISK (FR) 1997–2012 and FinHealth (FH) 2017 surveys<sup>b</sup>. The age range of included participants was 25–64 years (11,616 men and 13,380 women).

|                       | FR97  | FR02  | FR07  | FR12  | FH2017 |
|-----------------------|-------|-------|-------|-------|--------|
| <b>Blood pressure</b> |       |       |       |       |        |
| <b>Sex</b>            |       |       |       |       |        |
| Men                   | 9.5%  | 8.7%  | 9.4%  | 9.5%  | 10.2%  |
| Women                 | 7.1%  | 7.3%  | 7.5%  | 7.1%  | 6.5%   |
| <b>Education</b>      |       |       |       |       |        |
| Low                   | 35.4% | 36.5% | 37.0% | 30.6% | 37.3%  |
| Intermediate          | 29.7% | 31.5% | 34.3% | 38.5% | 33.8%  |
| High                  | 34.9% | 31.9% | 28.7% | 30.9% | 28.9%  |

<sup>a</sup>Systolic blood pressure  $\geq 140$  mmHg or diastolic blood pressure  $\geq 90$  mmHg

<sup>b</sup>Crude rates
